# Supplementary material
Source: Springer Nature journal article supplement (https://www.springermedizin.de/resource/supplementary/12987_2012_72_MOESM2_ESM.pdf/9680276)

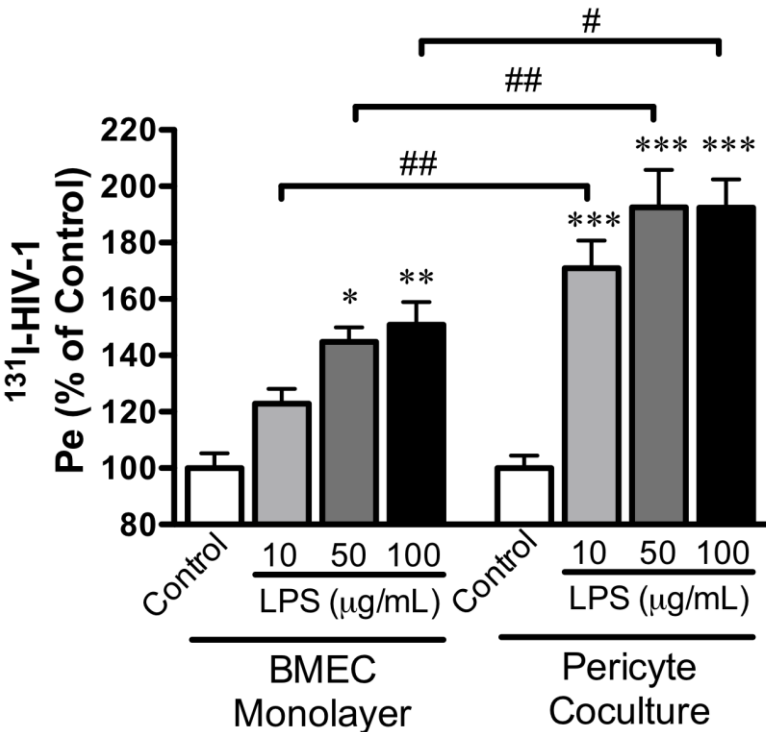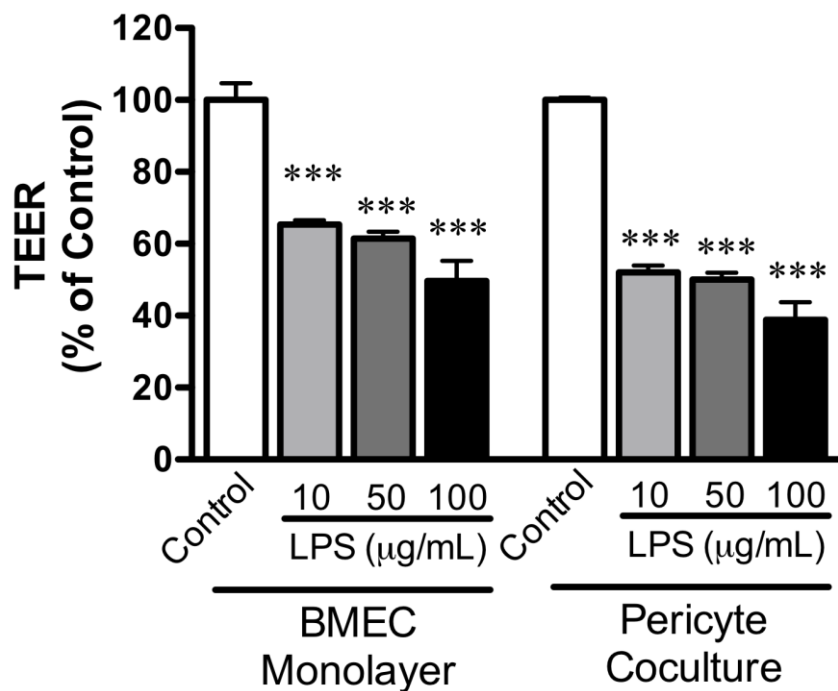

Supplement: MOESM2 [file 9680276]
